1 Time-dependent fitness effects can drive bet-hedging  
2 populations extinct

3 Eric Libby<sup>1\*</sup> and William Ratcliff<sup>2</sup>

<sup>1</sup> Santa Fe Institute, Santa Fe, New Mexico, United States

<sup>2</sup>School of Biology, Georgia Institute of Technology, Atlanta, Georgia, United States

\*To whom correspondence should be addressed; E-mail: [elibby@santafe.edu](mailto:elibby@santafe.edu)

**Keywords:** stochastic switching, time-dependent fitness, bet-hedging, competition, survival

4 **Abstract**

5 To survive unpredictable environmental change, many organisms adopt bet-hedging  
6 strategies that trade short-term population growth for long-term fitness benefits. Be-  
7 cause the benefits of bet-hedging may manifest over long time intervals, bet-hedging  
8 strategies may be out-competed by strategies maximizing short-term fitness. Here, we  
9 investigate the interplay between two drivers of selection, environmental fluctuations  
10 and competition for limited resources, on different bet-hedging strategies. We consider  
11 an environment with frequent disasters that switch between which phenotypes they  
12 affect in a temporally-correlated fashion. We determine how organisms that stochasti-  
13 cally switch between phenotypes at different rates fare in both competition and survival.  
14 When disasters are correlated in time, the best strategy for competition is among the  
15 worst for survival. Since the time scales over which the two agents of selection act are

16 significantly different, environmental fluctuations and resource competition act in op-  
17 position and lead populations to evolve diversification strategies that ultimately drive  
18 them extinct.

## 19 Introduction

20 In the face of unpredictable environmental change, some organisms have evolved diver-  
21 sification strategies that generate offspring poorly suited to the current environment,  
22 but well-adapted to a different future environment [1, 2, 3]. For example, clonal bac-  
23 terial lineages have evolved to produce both fast and slow growing phenotypes; the  
24 latter can better survive lethal antibiotic exposure [4, 5]. Organisms that adopt these  
25 strategies hedge their bets by sacrificing short-term increases in population expansion  
26 for potential long-term population growth [3, 6]. The time interval over which the  
27 long-term benefits of bet-hedging are realized depends in part on the frequency of  
28 environmental change [7, 8, 9]. Frequent environmental change can impose immedi-  
29 ate selection against organisms who do not bet-hedge [10], while hedging against rare  
30 events may require long time periods [11]. Environmental change, however, will only  
31 rarely be the sole driver of selection. Other processes, such as competition for limited  
32 resources, may act on shorter time scales than environmental fluctuation, causing op-  
33 timal bet-hedging strategies to go extinct before the long-term benefits are realized.  
34 In this paper, we investigate the interplay between these two drivers of selection.

35 Bet-hedging is a well-known survival strategy, evolved by diverse organisms, to in-  
36 crease fitness in risky, unpredictable environments [12, 13, 14, 15, 16, 17, 18, 19, 20].  
37 For example, desert annuals delay germination in some seeds to hedge against across-  
38 year variation in spring rainfall [1, 21]. Another example is the bacterial pathogen  
39 *Haemophilus influenza*, in which a single clone generates offspring with diverse sur-  
40 face antigens that increase the probability that some of the population will avoid de-  
41 struction by the host immune response [22, 23]. Concomitant with the abundance of  
42 bet-hedging, there are a wide array of molecular mechanisms for creating phenotypic

43 diversity, including contingency loci, stochastic gene expression, developmental insta-  
44 bility, and asymmetric cell division [24, 25, 26, 27]. These diversification mechanisms  
45 work together with reproductive strategies (e.g. asexual/sexual, clutch size) to enact  
46 particular forms of bet-hedging [12]. Considering the gamut of bet-hedging strategies is  
47 outside the scope of this paper, so for simplicity we will consider microbial bet-hedging,  
48 which is the focus of a large body of theoretical research [11, 28, 29, 30, 31, 32, 33].

49 Microbial bet-hedging is usually equated with stochastic switching strategies whereby  
50 a single genotype produces phenotypic heterogeneity in the absence of an apparent sig-  
51 nal or regulatory response [10, 13, 24, 34, 35]. Mathematical models of microbial  
52 bet-hedging typically assume that the organism switches reversibly between at least  
53 two distinct phenotypic states, and that these distinct phenotypic states are each suited  
54 to different possible environmental states. Such models align well with experimental  
55 bet-hedging systems including CAP+/- phenotypes in *Pseudomonas fluorescens* [36],  
56 antigen expression in *Salmonella* [37, 38], competence to non-competence switch for  
57 DNA transformation in *Bacillus subtilis* [39], and galactose utilization in engineered  
58 populations of *Saccharomyces cerevisiae* [40]. For the purposes of modeling, phenotypic  
59 switch events are typically random and independent so that population-level hetero-  
60 geneity follows a binomial or multinomial distribution, depending on the number of  
61 phenotypic states. A key area where models differ is the way in which environments  
62 fluctuate. For example, environmental fluctuations can occur randomly or after a fixed  
63 amount of time [28, 31, 32, 40, 41] and they can be symmetric or asymmetric in terms of  
64 how they switch and the selective pressure they exert [33, 41]. Whether or not stochas-  
65 tic switching confers a fitness benefit depends on the precise nature of environmental  
66 fluctuations.

67 In exponentially growing populations, the optimal rate of switching maximizes long-  
68 term geometric mean fitness [1, 8, 9, 42]. Indeed, models with expanding populations  
69 make it possible to calculate asymptotic growth rates [32]. The situation might be dif-  
70 ferent if, along with environmental fluctuations, organisms face limitations in resources  
71 so that there exists a carrying capacity that restricts population size. If the population

72 has not yet reached the carrying capacity, then each time an organism reproduces there  
73 is one less opportunity for reproduction by others in the population [43]. This couples  
74 the switching strategy of one organism to others, which could reward strategies that  
75 deny reproductive opportunities to other switching types either in the current environ-  
76 ment or some future environmental state. Furthermore, the finite limit of population  
77 size allows for the possibility of extinction due to demographic stochasticity.

78 Here, we examine the consequences of coupling and extinction, introduced through  
79 a carrying capacity, on the evolution of microbial bet-hedging. We extend a previously  
80 published model [12] in which phenotypes experience periodic disasters such as might  
81 occur as the result of an adaptive immune response. We allow disasters to be correlated  
82 in time and determine how switching strategies fare in competition and survival, i.e.  
83 long-term fitness. When disaster risk is uncorrelated in time, the best competitive  
84 strategy also maximizes long-term survival. The situation changes when disaster risk  
85 is strongly correlated in time; the best strategy for competition is among the worst for  
86 survival. Our results show that environmental fluctuations and resource competition  
87 can lead to the evolution of diversification strategies that ultimately drive populations  
88 extinct.

## 89 **Methods**

### 90 **Stochastic simulations**

91 We consider a population of genotypes that switch between two phenotypic states, A  
92 and B. The defining characteristic of a genotype is its probability/rate of switching  
93 between phenotypes, which we denote as  $p$ . We assume that the switch occurs stochas-  
94 tically upon reproductive events so that each time an A or B reproduces there is a  
95 fixed probability  $p$  that it yields a cell of the opposite type. The phenotypic states do  
96 not differ in any fitness relevant trait other than susceptibility to risk. This risk man-  
97 ifests in disasters that target either A or B phenotypes and removes them completely

98 from the population. We simulate the evolution of populations using a discrete time  
99 approach.

100 At each time step, there is a probability that a disaster occurs. We use a disaster  
101 probability of 10% for most results in this paper but explore the effects of changing this  
102 probability on time scales in Figure 5. If a disaster occurs, we then determine which  
103 phenotype it targets. A disaster targets the same phenotype as the previous disaster  
104 with probability  $t_c$  and the alternate phenotype with probability  $1-t_c$  (the first disaster  
105 target is random). If  $t_c = .5$  then the disaster targets a phenotype with no memory of  
106 previous targets. For  $t_c > .5$  there is an increased chance that the phenotype targeted  
107 will be the same as before. In this way, the parameter  $t_c$  determines the duration of  
108 an environment hostile towards  $A$  or  $B$  phenotypes and the temporal correlation of  
109 disasters.

110 Following the potential disaster, there is an opportunity for population turnover  
111 whereby a small fraction of the population is chosen for death. We use a default  
112 population turnover probability of 10% for most results in this paper but show the  
113 effects of changing this parameter in Figures 4 and 5. As a consequence of population  
114 turnover, even if a disaster does not occur the population still evolves.

115 After the effects of a possible disaster and population turnover, the remaining or-  
116 ganisms reproduce until the population is restored to a fixed size, the carrying capacity  
117  $N$ . For most results of the paper we consider  $N = 1000$ . Increasing this parameter  
118 increases the duration of competitions and survival. The effects of different values of  $N$   
119 on Figure 4 are considered in the Supplementary material. Reproduction to carrying  
120 capacity occurs through an iterative process whereby organisms are randomly chosen  
121 to reproduce according to their frequency in the population. The discrete time step  
122 ends once the carrying capacity is reached. We simulate the populations until one  
123 genotype goes extinct or a maximum number of time steps occur, here  $10^6$ . Computer  
124 simulations were conducted in the programming language julia and are provided in the  
125 Supplementary material.

126

## Differential equation model

127

As a complement to our stochastic simulations we consider a deterministic model that uses differential equations (Eqns 1) to model population regrowth following a disaster.

128

129

The simulation is still split into discrete rounds of disasters and regrowth however these events do not occur probabilistically. Instead, disasters occur every round and

130

131

target one phenotype for a fixed number of times. For example, there may be five

132

rounds of disasters targeting A types followed by five rounds of disasters targeting B

133

types. After each disaster the population regrows for a fixed amount of time, ( $t = 100$ ,

134

though we consider other values of  $t$  in the Supplementary material), with a constant

135

rate of population turnover described by the parameter  $\alpha$ . We compute the frequency

136

of types that switch according to probability  $p_1$  which is equal to  $\frac{A_1+B_1}{A_1+B_1+A_2+B_2}$  after

137

1000 environmental cycles. The differential equations were solved using Matlab and

138

computer code is provided in the Supplementary material.

$$\begin{aligned} R &= \left(1 - \frac{A_1 + B_1 + A_2 + B_2}{N}\right) & (1) \\ \frac{dA_1}{dt} &= R(1 - p_1)A_1 + Rp_1B_1 - \alpha A_1 \\ \frac{dB_1}{dt} &= R(1 - p_1)B_1 + Rp_1A_1 - \alpha B_1 \\ \frac{dA_2}{dt} &= R(1 - p_2)A_2 + Rp_2B_2 - \alpha A_2 \\ \frac{dB_2}{dt} &= R(1 - p_2)B_2 + Rp_2A_2 - \alpha B_2 \end{aligned}$$

139

## Results

140

### Survival

141

In our model, the probability of switching phenotypes determines whether an organism

142

can survive the challenge of repeat disasters. We vary the probability of repeat disasters

143

( $t_c$ ) from 0 to 1 and compute for each value of  $t_c$  the number of times out of 1000

144 stochastic simulations a switching strategy survives  $10^6$  rounds of potential disasters,  
145 population turnover, and regrowth (see Figure 1). For fast switching probabilities,  
146  $p \geq .1$ , genotypes rarely go extinct (less than 1% of the time). In contrast, for slow  
147 switching probabilities,  $p \leq .025$ , all organisms went extinct before the end of  $10^6$   
148 rounds. For switching probabilities in between these values, e.g.  $p = .05$  and  $p =$   
149  $.075$ , there is a non-monotonic relationship between  $t_c$  and the frequency of extinction.  
150 Genotypes are less likely to go extinct at the extremes of  $t_c$ , i.e. close to 0 or 1, as  
151 compared to intermediate values, e.g.  $t_c = .65$ .

152 At  $t_c$  close to 1 there are long periods of disasters targeting the same phenotype.  
153 In the extreme case where  $t_c = 1$  disasters never switch phenotypes, so as long as an  
154 organism diversified into two phenotypes at least once it would survive. As  $t_c$  decreases  
155 from 1 the probability of extinction increases because disasters more frequently switch  
156 between phenotypes.

157 At the opposite extreme, with  $t_c$  close to 0, disasters frequently switch between  
158 targeted phenotypes. While this seems like a challenging environment to survive, it  
159 is actually easier than an environment with longer periods of disasters targeting the  
160 same phenotype. The reason is that extinction in these simulations occurs through a  
161 lack of phenotypic diversification: an organism exists entirely in one phenotypic state  
162 when a disaster strikes that phenotype. After a disaster annihilates one phenotype, say  
163  $A$ , the surviving phenotype,  $B$ , has a certain number of reproductive events in which  
164 to diversify. The probability that a  $B$  fails to produce at least one of the opposite  
165 phenotype,  $A$ , is  $(1 - p)^m$  where  $p$  is the switching probability and  $m$  is the number  
166 of reproductive events. The expected number of  $A$  types produced is  $mp$ , assuming  
167 that the  $B$  phenotype is the only one who gets to reproduce. Now, there are  $N - mp$   
168 organisms of type  $B$  and  $mp$  of type  $A$ . This sets the stage for why an environment  
169 with  $t_c = 0$  is easier to survive than one with an intermediate value of  $t_c = .65$ .

170 If the next disaster switches targets and annihilates the  $B$  type, as would be the  
171 case if  $t_c = 0$ , then the  $A$  types would have  $N - mp$  opportunities to diversify and  
172 produce a  $B$  type. The chance of failure here is  $(1 - p)^{N - mp}$ . If, instead,  $t_c$  were greater

173 than zero then there is a chance that the disaster would target the same phenotype as  
174 before, and annihilate any new  $A$  types produced. This would give the  $B$  phenotypes  
175 only  $mp$  opportunities to diversify and produce an  $A$ . The chance of failure in this case  
176 is  $(1 - p)^{mp}$ . The difference between these two chances of failures can be many orders  
177 of magnitude: if, for instance,  $p = .05$ ,  $m = 500$ , and  $N = 1000$  then the probability  
178 of not diversifying goes up from  $1.91 * 10^{-20}\%$  to 27.7%.

## 179 **Competition**

180 If the only selective pressure were long-term survival, then the probability of switching  
181 should be high to avoid extinction. However, there are often other forms of selection  
182 acting on populations. We now consider what happens when there is competition in the  
183 form of another genotype present in the population. We vary the probability of repeat  
184 disasters ( $t_c$ ) from 0 to 1 and compute for each value of  $t_c$  which switching strategy is  
185 the best in pairwise competitions. The best strategy is the one that drives competitors  
186 extinct more often than it, itself, goes extinct. The optimal probability of switching  
187 decreases the more a disaster is likely to target the same phenotype, i.e. the higher  
188 the value of  $t_c$  (see Figure 2A). If the disasters frequently switch phenotypes such that  
189  $t_c \leq 0.50$  then the best strategy in pairwise competitions is to rapidly diversify and  
190 switch phenotypes often. Thus, in this regime the optimal switching probability is  
191  $p = 1$ .

192 If, instead, disasters seldom switch the phenotype they target ( $t_c \gg .5$ ) then  
193 there is a cost to phenotypic diversification. Consider the case in which a disaster has  
194 removed all of the  $A$  phenotypes. As the  $B$  phenotypes reproduce to reach the carrying  
195 capacity any  $A$  types they produce will likely be lost to the next disaster. On the other  
196 hand, failing to diversify at all,  $p = 0$ , will lead to the genotype going extinct should the  
197 disaster switch the phenotype it targets. When risk is correlated in time, the optimal  
198 switching strategy must strike a balance between diversifying too much into the form  
199 that the disaster is targeting and not diversifying at all. As a point of reference from



200 Figure 2A, if  $t_c = 0.99$  then the optimal switch probability that strikes this balance is  
201  $p = 0.01$ . These results echo earlier studies of bet-hedging populations in the absence  
202 of carrying capacity [3, 6, 44].

203 Although the optimal switching strategy changes with the probability of repeat  
204 disaster ( $t_c$ ), it is unclear how poorly a suboptimal switching strategy performs. To  
205 test this, we picked the best switching strategies for  $t_c = .5$  ( $p = 1$ ) and  $t_c = .99$   
206 ( $p = .01$ ) and competed them against the optimal switching strategies for a range of  $t_c$   
207 values (see Figure 2B). The performance quickly drops off such that if either strategy  
208 is competed against the optimal strategy at a  $t_c$  different by  $.1$ , it wins less than 10%  
209 of the time. Furthermore,  $p = 1$  competes as unsuccessfully against  $p = .01$  at  $t_c = .99$   
210 as  $p = .01$  competes against  $p = 1$  at  $t_c = .5$  – they each win less than 1% of the time.

211 Due to the stochastic nature of these competitions, suboptimal strategies can occa-  
212 sionally beat optimal strategies. To understand what happens in these competitions,  
213 we investigate the competition between  $p = 1$  and  $p = .01$  at  $t_c = .99$ . On the rare  
214 occasions that  $p = 1$  wins, the dynamics of disasters show frequent change in the tar-  
215 getted phenotype, mimicking an environment with a lower value of  $t_c$  in which  $p = 1$  is  
216 more adaptive (see Figure 3A). In contrast, the more typical scenario is that disasters  
217 infrequently switch the target phenotype and thereby penalize strategies that adopt  
218 rapid phenotypic diversification (see Figure 3B). The trajectory of this extinction shows  
219 that each disaster gives an incremental numerical advantage to the slower switching  
220 strategy. This acts as a steady drain which ultimately leads the  $p = 1$  genotype to  
221 extinction.

222 The different trajectories in Figure 3A and 3B demonstrate the two ways in which  
223 organisms can go extinct during competition in our mathematical model. The first way  
224 is through a lack of phenotypic diversification as was discussed in the “Survival” section  
225 and is how the fast switcher beats the slow switcher (see Figure 3C). The second way  
226 is through population turnover and is how the slow switcher defeats the fast switcher  
227 (see Figure 3D). Extinction due to population turnover occurs during the death and  
228 replacement phase of our simulations. A consequence of replacement is that there are

229 fluctuations in population abundances. If each organism has a probability  $\alpha$  to be  
230 chosen for replacement, i.e. death, then the probability a population of  $m$  organisms  
231 goes extinct in a single round of replacement is  $\alpha^m$ . In order for this form of extinction  
232 to be realized a genotype must be rare, i.e.  $m$  must be small.

233 Although genotypes could become rare randomly through a set of unfortunate re-  
234 placement events, usually it occurs because of a particular sequence of disasters. For  
235 instance, there could be a sequence of sudden switches in the phenotype targeted for  
236 disaster which would leave genotypes that switch infrequently as the rare type. Alter-  
237 natively when disasters repeatedly target a single phenotype then the genotype that  
238 switches frequently can become rare. The latter case befalls the genotype with  $p = 1$  in  
239 an environment with  $t_c = .99$ . To illustrate how this happens, consider two genotypes  
240 with switching probabilities  $p_1$  and  $p_2$  that just experienced a disaster eliminating all  
241  $m$  of one phenotype. In the growth back to carrying capacity, we assume for simplic-  
242 ity that they evenly split the remaining spots in the population, i.e.  $\frac{m}{2}$  reproductive  
243 events are allotted to each genotype after the first disaster. Over  $k$  disasters and no  
244 replacement other than growth back to carrying capacity, then the genotype with a  
245 switch probability of  $p_1$  will gain an amount shown in Eqn. 2.

$$(1-p_1)\frac{m}{2} + (1-p_1)\frac{m}{2}\frac{(p_1+p_2)}{2} + \dots + (1-p_1)\frac{m}{2}\frac{(p_1+p_2)^k}{2^k} = (1-p_1)\frac{m}{2}\frac{1 - \left(\frac{p_1+p_2}{2}\right)^k}{1 - \frac{p_1+p_2}{2}} \quad (2)$$

246 Thus, the genotype with  $p_1$  will have  $\frac{1-p_1}{1-p_2}$  as much of the  $m$  pool as the genotype with  
247  $p_2$ . If one genotype switches with  $p = 1$  then the other will eventually get the entire  
248 pool of  $m$ . This route to rarity is particularly effective if  $m$  is close to the carrying  
249 capacity  $N$ . Once a type is rare then population turnover can lead it to extinction.

250 The route to extinction that relies on population turnover is not unique to our  
251 stochastic simulation model. We can reformulate our model such that population  
252 growth occurs deterministically according to a set of differential equations (see Meth-  
253 ods: Differential equation model, and Eqn. 1). These equations consider continuous  
254 population turnover rather than discrete rounds as was the case in the stochastic sim-

255       ulations. If populations grow for a fixed time according to these equations and then  
256       experience disasters that reset the A or B phenotypes back to 0 then we find that the  
257       amount of population turnover, i.e. the value of the  $\alpha$  parameter, determines whether  
258       a slow ( $p_1 = .01$ ) or fast ( $p_2 = 1$ ) switcher wins (see Figure 4). This is because follow-  
259       ing a disaster, the initial growth of a genotype is determined by  $R(1 - p) - \alpha$  which  
260       decreases with larger switching probabilities  $p$ . Indeed, for  $p = 1$  this term is negative  
261       and the genotype drops in frequency for a short time. If disasters happen frequently  
262       and target the same phenotype then this  $\alpha$  can be the dominant force in determining  
263       the winner.

264       We return to our stochastic model to weigh the competing pressures of competition  
265       and survival. In an environment of  $t_c = .99$  a strategy of  $p = .01$  always goes extinct  
266       when considered in isolation (Figure 1) and yet it is the best strategy for competition  
267       (Figure 2). The reason for this seeming contradiction is a significant difference in time  
268       scales (see Figure 5A). The time it takes  $p = .01$  to go extinct is at least ten times  
269       greater than the time it takes to win a competition. Thus, while we expect  $p = .01$  to  
270       go extinct eventually, it has enough time to outcompete faster switchers with  $p = 1$ .

271       The different time scales for competition and survival can be adjusted by chang-  
272       ing parameters such as the rate of population turnover (see Figure 5B) or disaster  
273       probability (see Supplementary material). By decreasing the probability of population  
274       turnover (similar to  $\alpha$  in the differential equation model), we can increase the time it  
275       takes for the slow switcher ( $p = .01$ ) to win the competition against a fast switcher  
276       ( $p = 1$ ). Similarly, the decreased value of population turnover gives less opportunities  
277       to diversify and so reduces the survival time. The net effect is that the survival time  
278       scale is shorter than the time scale for competition. As a result, the slow switcher goes  
279       extinct before winning the competition (see Figure 5C).

280       So far the cases considered have all been competitions between only two genotypes  
281       in an environment with fixed  $t_c$ . To see if populations of potentially many genotypes can  
282       evolve to respond to the selective pressure imposed by the value of  $t_c$ , we implement an  
283       evolutionary simulation in which genotypes mutate to give rise to new genotypes with a

284 new characteristic switch rate. The mutation probability is  $10^{-3}$  and a new switching  
285 probability is chosen from a uniform distribution from  $10^{-5}$  to 1. We begin each  
286 simulation with a clonal population whose switch rate is  $p = .0001$ . The population  
287 goes through rounds of death and reproduction in a fixed environment ( $t_c$ ) for 100K  
288 iterations or until the population goes extinct. Figure 6A shows evolution within a  
289  $t_c = .99$  environment. The average probability of switching from 1000 simulations  
290 evolves to the optimal switching probability  $p = .01$  but all go extinct prior to 80K  
291 rounds. This contrasts sharply with evolution in a  $t_c = .5$  environment in which only  
292 6 of 1000 simulations went extinct (Figure 6B). All other simulations lasted the entire  
293 duration with an average switching probability close to the optimal of  $p = 1$ .

294 The speed of adaptation and general results are further confirmed in Figures 6C  
295 and D when populations experience an environmental shift. Figure 6C shows the  
296 evolution of a population that survived  $t_c = .99$  (a rare event) and is subsequently  
297 transferred to a different environment with  $t_c = .5$ . In  $t_c = .99$ , the population  
298 evolves to the optimal switch probability:  $p = .01$ . As the environment changes to  
299  $t_c = .5$ , the population adapts by evolving to a switch rate close to the optimal of  
300  $p = 1$ . The population remains at a high switch rate and survives for the rest of the  
301 simulation, 100K iterations. The reverse environmental fluctuation is shown in Figure  
302 6D: a population evolving in  $t_c = .5$  is transferred to an environment with  $t_c = .99$ .  
303 In this simulation, the population evolves to  $p > .7$  in  $t_c = .5$ . When the environment  
304 shifts to  $t_c = .99$ , the population evolves to  $p = .01$  and fluctuates before ultimately  
305 going extinct. In this scenario, the drive to respond to competition left the winning  
306 genotypes vulnerable to extinction from unpredictable environmental stress.

## 307 Discussion

308 Stochastic phenotype switching is a canonical microbial bet-hedging strategy that in-  
309 creases fitness and long-term survival in unpredictable environments [6, 10, 13, 24, 34,  
310 35]. However, the long time scales over which some bet-hedging strategies are manifest

311 may conflict with other selective pressures. We uncover such an evolutionary tension  
312 between the timescales at which bet-hedging traits are adaptive. We study a math-  
313 ematical model where environmental disasters select for diversification bet-hedging  
314 strategies, i.e. organisms switch between phenotypes to survive stochastic selection.  
315 We find that in environments where the type of disaster is positively correlated in  
316 time, switch rates that optimize competitiveness were favored over the short-term,  
317 while those that allow genotypes to avoid extinction were favored over the long-term.  
318 Since the time scale for competition is shorter than that for survival, populations evolve  
319 better competitive bet-hedging strategies, but this ultimately leaves them vulnerable  
320 to extinction.

321 The model presented in this paper has four key elements: genotypes that switch  
322 between phenotypes, disasters that annihilate a specific phenotype, population turnover  
323 caused by non-disaster death, and regrowth back to a carrying capacity. These elements  
324 are quite general and may appear in many real biological systems. Ecologically, one  
325 can think of our model as being a description of free-living bacteria that risk exposure  
326 to lytic phage capable of infecting only one of the two host phenotypes [45, 46], or  
327 bacteria living in a host risking detection by the immune system. These disasters  
328 occur stochastically, but the type of disaster (favoring either A or B cells) may be  
329 correlated in time. Furthermore, population expansion may be limited by the available  
330 space and resources found in the environment or host. Interestingly, in the bacteria-host  
331 scenario, if the host continually mounts a response against the most abundant bacterial  
332 phenotype then this would be similar to an environment  $t_c = 0$  when “disasters”,  
333 i.e. immune responses, continually switch between targeted phenotypes. In this case,  
334 the survival probability of a switching organism actually increases when compared to  
335 environments with intermediate values of  $t_c$ .

336 In the absence of temporal correlation of disasters, the strategy that maximizes  
337 short-term fitness also maximizes long-term survival ( $p = 1$  in  $t_c = .5$  wins in com-  
338 petitions and never goes extinct). In contrast, when risk is correlated in time, the  
339 strategy that maximizes short-term competitive fitness becomes one of the worst for

340 long-term survival, and vice versa. Over short time periods selection favors traits that  
341 increase reproductive success. When risk is correlated in time slower rates of stochastic  
342 switching increase fecundity and competitive fitness because offspring of the opposite  
343 phenotype are likely to be killed by the next disaster. The downside of slower switching  
344 organisms is that they are far more susceptible to extinction (see Figure 1). Slower  
345 stochastic switching thus exhibits strong time-dependent fitness effects in our model,  
346 being advantageous over the short-term but costly over long time periods (see Figure  
347 5). Importantly, in our simulations fast-switching strains capable of long-term survival  
348 in high  $t_c$  environments were driven extinct during competition by slower switching  
349 strains that then promptly went extinct following a disaster (see Figure 6).

350 Most prior models studying stochastic switching in fluctuating environments con-  
351 sider continuous populations that grow without limits [1, 8, 9, 32, 42]. This has two  
352 major effects relevant to the study of bet-hedging: first, it eliminates the risk of extinc-  
353 tion caused by environmental fluctuations, and second, it decouples competing lineages  
354 so that the behavior of one lineage has no effect on the absolute fitness of competitors  
355 within the same population. We relax both of these constraints and find that imposing  
356 a carrying capacity on the population radically changes the ability for natural selec-  
357 tion to favor the bet-hedging strategy that maximizes long-term fitness. By enforcing  
358 a lower limit on the probability of extinction, a carrying capacity allows extinction to  
359 play a powerful demographic role in shaping life history evolution. Without a carrying  
360 capacity, populations could expand to the point that extinction is no longer a threat.

361 In addition to affecting survival, carrying capacities are also instrumental in com-  
362 petition. By limiting opportunities for reproduction, a carrying capacity couples the  
363 fitness consequences of one strain's switching strategy to its competitors. Specifically,  
364 the effects of employing one strategy determines the number of available reproductive  
365 events for the other strategy— either in the same round of growth, or a future round.  
366 As a result, strains with higher short-term fitness, but lower long-term fitness, can  
367 displace competitors (see Figure 6). These competitive effects should become more in-  
368 fluenial if one phenotype reproduces slower than another, as is the case with bacterial

369 persistence [5]. Optimal fitness with bacteria persistence balances a trade-off between a  
370 fast-growing/antibiotic-susceptible phenotype and a dormant/antibiotic-resistant phe-  
371 notype [6]. Imposing a carrying capacity on a population of microbes hedging against  
372 antibiotic exposure via persistence would create an additional tradeoff in which pro-  
373 duction of dormant cells would limit the number of other cells that could be produced.  
374 These tradeoffs also exist in systems with regular, predictable environmental change  
375 as might be found in experimental populations of *Pseudomonas fluorescens* [43]. The  
376 only requirements are a limit to population growth and organisms that can produce  
377 more than one phenotype with different reproductive rates.

378 The stochastic phenotype switching considered in this paper fits within the hier-  
379 archical model of bet-hedging advanced by Andrew Simons [47]: stochastic switching  
380 itself is a primary bet-hedging trait that effectively improves fitness in unpredictable,  
381 fluctuating environments, while rapid switch rates can be a second-order bet-hedging  
382 trait beneficial only over long time periods. With this view, organisms that do not  
383 switch phenotypes are quickly driven extinct by environmental fluctuations. Long-  
384 term selection clearly favors switch rates rapid enough to avoid extinction, but this  
385 works against short-term selection for slow switching imposed by competition. De-  
386 pending on the switch rates, there may be a significant time scale asymmetry between  
387 these selective agents. This asymmetry, coupled with the very real possibility of ex-  
388 tinction during early-phase competition, may limit the ability of natural selection to  
389 favor higher-level bet-hedging strategies that maximize long-term fitness.

390

## Figures

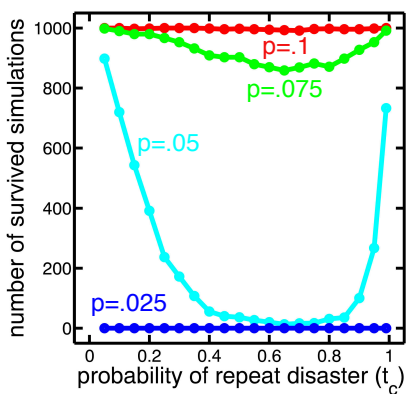

Figure 1: **Survival as a function of the probability of switching and the probability of a repeat disaster.** The number of extinctions out of 1000 for genotypes with different switch probabilities is shown as a function of the probability that a disaster repeats the phenotype it targets. Fast switchers  $p \geq .1$  rarely go extinct while slow switchers  $p \leq .025$  always go extinct. Intermediate values of  $p$  show a non-monotonic relationship in which extinction reaches a maximum around  $t_c = .65$ .



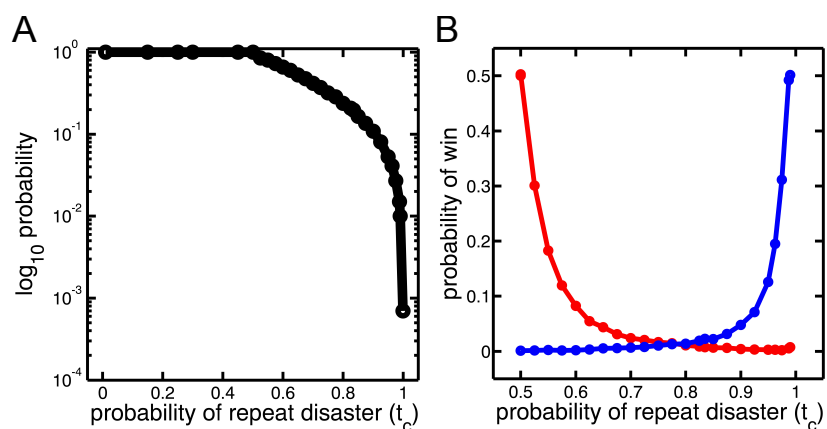

Figure 2: **Optimal switching strategy versus the probability that a disaster targets the same phenotype** **A)** The switching probability that beats all others in pairwise competitions is shown as a function of the probability of repeat disasters  $t_c$ . The switching probability decreases with increasing value of  $t_c$ . **B)** A switch probability of  $p = 1$  (red) or  $p = .01$  (blue) is competed against the optimal switch probability for a range of  $t_c$  values (on the horizontal axis). Each strategy quickly drops in performance, as measured by the number of wins, by a factor of more than 5 with a .1 change in  $t_c$ .

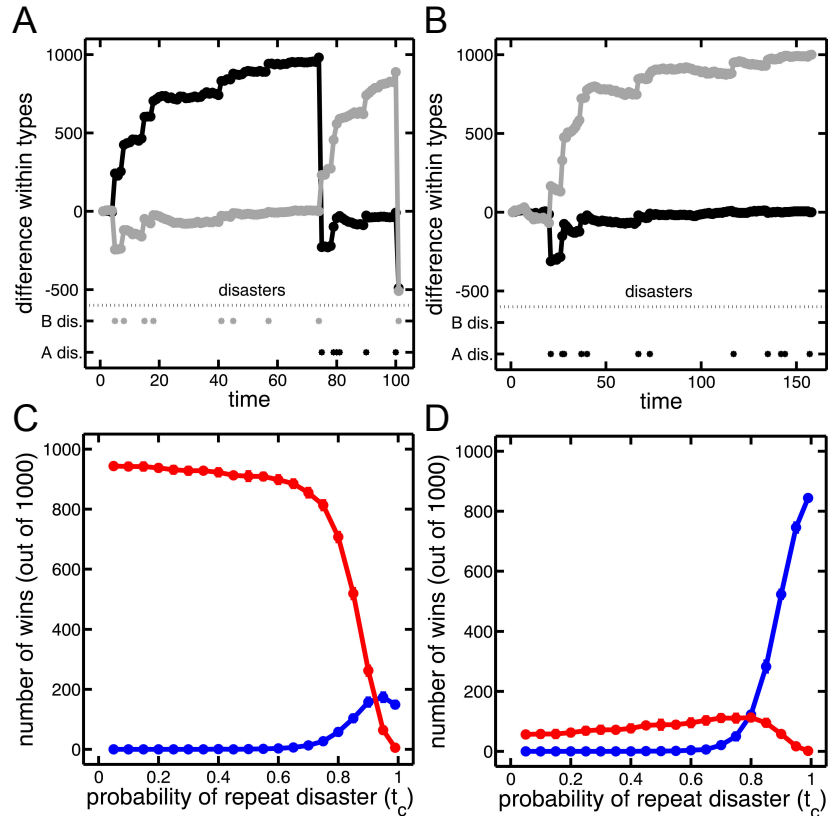

Figure 3: **Characteristic manner different switching strategies win.** **A)** The difference between A (gray) and B types (black) of a slow ( $p = .01$ ) and fast ( $p = 1$ ) switching strategy, e.g.  $A_{\text{slow}} - A_{\text{fast}}$ , are plotted over the course of many disasters with  $t_c = .99$ . The phenotype targeted by the disaster is shown at the bottom. The faster switching phenotype wins because the disasters switch targets and mimic an environment with a lower  $t_c$ . **B)** Here, the slow switching phenotype wins as repeated disasters slowly diminish the fast switching population. **C)** The number of wins (out of 1000) decided by a disaster switching phenotypes is shown as a function of the probability of repeat disasters. The fast switcher ( $p = 1$ , red) wins most of the competitions over the slow switcher ( $p = .01$ , blue) in this manner. **D)** Similar to C) except population turnover causes genotypes to win. In comparison to C), the slow switcher ( $p = .01$ , blue) wins more than 80% of its victories in this manner. Thus, fast switchers tend to win when disasters target both A and B phenotypes in rapid succession while slow switchers tend to win via a longer draining process.

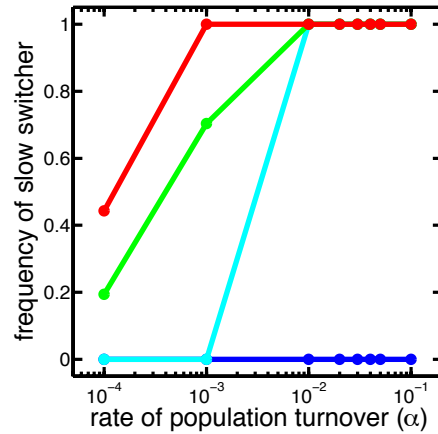

Figure 4: **Population turnover determines the winner in a differential equation model.** The frequency of the population composed of the slow switcher ( $p = .01$ ) as opposed to the fast switcher ( $p = 1$ ) is plotted against the rate of population turnover,  $\alpha$ , in the differential equation model Eqn. 1. The different colors correspond to the number of disasters faced before the targeted phenotype is switched: 1 (blue), 5 (cyan), 10 (green), 25 (red). In this way the red line corresponds to a higher value of  $t_c$  than the blue. As the rate of population turnover increases, the slow switcher gains in frequency for all but the blue curve which corresponds to the lowest value of  $t_c$ . The minimal value of population turnover that leads to the slow switcher winning decreases with longer durations in environments, i.e. higher  $t_c$  values.

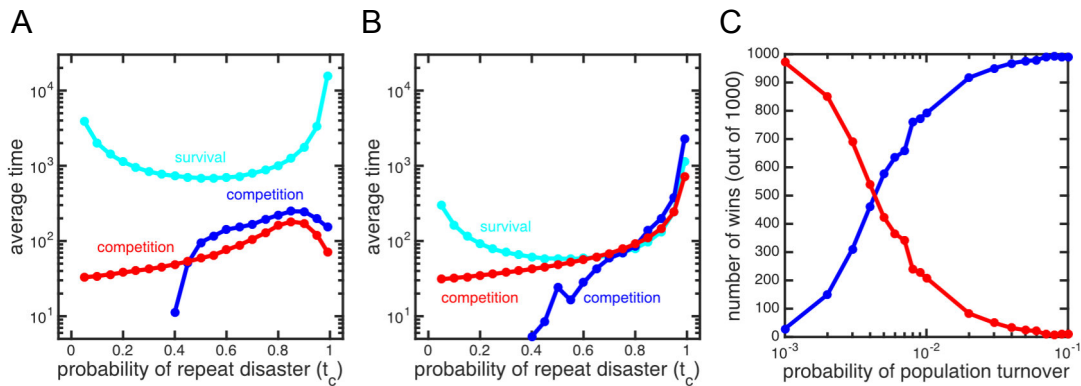

**Figure 5: Time scale separation for survival and competition** **A)** The time scales over which the selective pressures of survival and competition act are shown as a function of the probability of repeat extinction. Each time is an average of 10000 simulations. The time for the slow switching strategy ( $p = .01$ ) to go extinct (cyan) is at least ten times longer than it takes either  $p = .01$  (blue) or  $p = 1$  (red) to win in competition. The fast switching strategy did not go extinct and so is not plotted. **B)** The same as in A) except that the probability of population turnover is 100 times lower. The time scale for competition at  $t_c = .99$  is now longer than the time scale for survival. This means that the  $p = .01$  strategy will go extinct before winning the competition. **C)** The number of wins out of 1000 for  $p = .01$  (blue) or  $p = 1$  (red) switchers is shown as a function of population turnover when  $t_c = .99$ . The lower value of population turnover in B) is where the shorter survival times dominate and fast switchers win more often. As population turnover increases to the value in A), the survival time scale becomes longer allowing competition to dominate and the slower switcher to win more frequently.

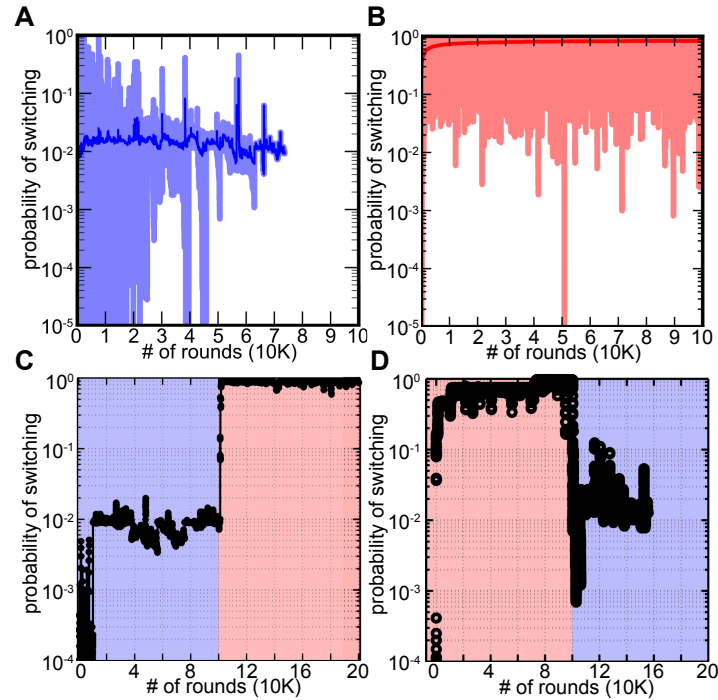

**Figure 6: Evolution of switch rates in environments with different probabilities of repeat disasters.** **A)** The average probability of switching over 1000 simulations of evolving populations (dark blue) is plotted over time in an environment with  $t_c = .99$ . The lighter area shows simulated populations removing the top and bottom 5%. Populations quickly evolve to  $p = .01$  and then go extinct. **B)** Similar to A) but with  $t_c = .5$  and a red scale for coloring. Populations evolve a probability of switching close to  $p = 1$  and all but 6 out of 1000 survive the duration of the simulation. **C)** Similar to A) and B) but environments switch from  $t_c = .99$  (blue) to  $t_c = .5$  (red). It took many simulations to find a population that survived  $t_c = .99$  but once it did, transfer to an environment with  $t_c = .5$  saw the evolution of higher probabilities of switching close to the optimal  $p = 1$  (average switch probability shown in black). **D)** Same as C) but in reverse order. The population average (black) evolves to the optimal competitive probabilities  $p = 1$  in  $t_c = .5$  (red) and  $p = .01$  in  $t_c = .99$  (blue) but ultimately goes extinct in  $t_c = .99$ .

391

## References

392

[1] Cohen D. 1966 Optimizing reproduction in a randomly varying environment. *J.*

393

*Theoret. Biol.* 12, 119 – 129. (doi:10.1016/0022-5193(66)90188-3)

394

[2] Slatkin M. 1974 Hedging one's evolutionary bets. *Nature* 250, 704–705.

395

(doi:10.1038/250704b0)

396

[3] Seger J. B. & Brockmann H. 1987 What is bet hedging? In *Oxford surveys in*

397

*evolutionary biology*, vol. 4 (eds P. Harvey & L. Partridge), pp. 182–211. Oxford,

398

UK: Oxford University Press.

399

[4] Keren I., Kaldalu N., Spoering A., Wang Y., Lewis K. 2004 Persister cells and tol-

400

erance to antimicrobials. *FEMS Microbiol. Lett.* 230, 13 – 18. (doi:10.1016/S0378-

401

1097(03)00856-5)

402

[5] Balaban, N. Q., Merrin, J., Chait, R., Kowalik, L. & Leibler, S. 2004 Bacterial

403

persistence as a phenotypic switch. *Science* 305, 1622 – 1625. (doi:10.1126/science.

404

1099390)

405

[6] Kussell E., Kishony R., Balaban N. Q., Leibler S. 2005 Bacterial persistence:

406

a model of survival in changing environments. *Genetics* 169, 1807 – 1814.

407

(doi:10.1534/genetics.104.035352)

408

[7] Bull J. J. 1987 Evolution of phenotypic variance. *Evolution* 41, 303–315.

409

(doi:10.2307/2409140)

410

[8] Levins R. 1962 Theory of fitness in a heterogeneous environment. I. The fitness

411

set and the adaptive function. *Am. Nat.* 96, 361 – 373. (doi:10.1086/282245)

412

[9] Donaldson-Matasci M. C., Lachmann M., Bergstrom C. T. 2008 Phenotypic diver-

413

sity as an adaptation to environmental uncertainty. *Evol. Ecol. Res.* 10, 493–515.

414

[10] Libby E. & Rainey P.B. 2011 Exclusion rules, bottlenecks and the evolution

415

of stochastic phenotype switching. *Proc. R. Soc. B.* 278(1724):3574-83. (doi:

416

10.1098/rspb.2011.0146)

- 417 [11] King O. D. & Masel J. 2007 The evolution of bet-hedging adaptations to rare  
418 scenarios. *Theoret. Popul. Biol.* 72, 560 – 575. (doi:10.1016/j.tpb.2007.08.006)
- 419 [12] Ratcliff W. C., Hawthorne P., Libby E. 2015 Courting disaster: How diversification  
420 rate affects fitness under risk. *Evolution* 69(1):126–35. (doi: 10.1111/evo.12568)
- 421 [13] Smits W. K., Kuipers O. P., Veening J.-W. 2006 Phenotypic variation in bacte-  
422 ria: the role of feedback regulation. *Nat. Rev. Microbiol.* 4, 259 – 271. (doi:10.  
423 1038/nrmicro1381)
- 424 [14] Danforth B. N. 1999 Emergence dynamics and bet hedging in a desert bee, *Perdita*  
425 *portalis*. *PNAS* 266: 1985–1994.
- 426 [15] Tonegawa S. 1983 Somatic generation of antibody diversity. *Nature* 302, 575–581.
- 427 [16] Hairston N. G. & Munns W. R. 1984 The timing of copepod diapause as an  
428 evolutionary stable strategy. *Am. Nat.* 123, 733–751.
- 429 [17] Fell P. E. 1995 Deep diapause and the influence of low temperature on the hatching  
430 of the gemmules of *Spongilla lacustris* (L) and *Eunapius fragilis* (Leidy). *Inverte-*  
431 *brate Biology* 114: 3–8.
- 432 [18] Martin K. L. M. 1999 Ready and waiting: delayed hatching and extended incu-  
433 bation of anamniotic vertebrate terrestrial eggs. *American Zoologist* 39:279–288.
- 434 [19] Andreadis T. G. 1990 Observations on installment egg hatching in the brown  
435 salt-marsh mosquito, *Aedes cantator*. *Journal of the American Mosquito Control*  
436 *Association* 6: 727–729.
- 437 [20] Crump M. L. 1981. Variation in propagule size as a function of environmental  
438 uncertainty for tree frogs. *Am. Nat.* 117:724–737.
- 439 [21] Venable D. L. 2007 Bet hedging in a guild of desert annuals. *Ecology* 88, 1086–  
440 1090.
- 441 [22] Hosking S. L., Craig J. E., High N. J. 1999 Phase variation of *lic1A*, *lic2A* and  
442 *lic3A* in colonization of the nasopharynx, bloodstream and cerebrospinal fluid by  
443 *Haemophilus influenzae* type b. *Microbiology* 145 ( Pt 11):3005–11.

- 444 [23] Bayliss C. D., Field D., Moxon R. E. 2001 The simple sequence contingency loci of  
445 *Haemophilus influenzae* and *Neisseria meningitidis*. *J Clin Invest.* 107(6): 657–666.  
446 (doi: 10.1172/JCI12557)
- 447 [24] Martins B. M. & Locke J. C. 2015 Microbial individuality: how single-cell hetero-  
448 geneity enables population level strategies. *Curr Opin Microbiol.* 24:104–12. (doi:  
449 10.1016/j.mib.2015.01.003)
- 450 [25] Moxon E. R., Rainey P. B., Nowak M. A., Lenski R. E. 1994 Adaptive evolution  
451 of highly mutable loci in pathogenic bacteria. *Curr. Biol.* 4, 24–33. (doi:10.1016/  
452 S0960-9822(00)00005-1)
- 453 [26] Kaern M., Elston T. C., Blake W. J., Collins J. J. 2005 Stochasticity in gene  
454 expression: from theories to phenotypes. *Nat. Rev. Genet.* 6, 451 – 464. (doi:10.  
455 1038/nrg1615)
- 456 [27] Markow T. A. 1995 *Evolutionary Ecology and Developmental Instability*. *Annu.*  
457 *Rev. Entomol.* 40: 105–120.
- 458 [28] Thattai M. & van Oudenaarden A. 2004 Stochastic gene expression in fluctuating  
459 environments. *Genetics* 167, 523 – 530. (doi:10.1534/genetics.167.1.523)
- 460 [29] Wolf D. M., Vazirani V. V., Arkin A. P. 2005 A microbial modified prisoner’s  
461 dilemma game: how frequency-dependent selection can lead to random phase  
462 variation. *J. Theoret. Biol.* 234, 255 – 262. (doi:10.1016/j.jtbi.2004.11.021)
- 463 [30] Wolf D. M., Vazirani V. V., Arkin A. P. 2005 Diversity in times of adversity:  
464 probabilistic strategies in microbial survival games. *J. Theoret. Biol.* 234, 227 –  
465 253. (doi:10.1016/j.jtbi.2004.11.020)
- 466 [31] Visco P., Alled R. J., Majumdar S. N., Evans M. R. 2010 Switching and growth  
467 for microbial populations in catastrophic responsive environments. *Biophys. J.* 98,  
468 1099 – 1108. (doi:10.1016/j.bpj.2009.11.049)
- 469 [32] Kussell E. & Leibler S. 2005 Phenotypic diversity, population growth, and in-  
470 formation in fluctuating environments. *Science* 309, 2075 – 2078. (doi:10.1126/  
471 science.1114383)



- 472 [33] Gaal B., Pitchford J. W., Wood A. J. 2010 Exact results for the evolution of  
473 stochastic switching in variable asymmetric environments. *Genetics* 184, 1113 –  
474 1119. (doi:10.1534/genetics.109.113431)
- 475 [34] Beaumont H. J. E., Gallie J., Kost C., Ferguson G., Rainey P. B. 2009 Experi-  
476 mental evolution of bet-hedging. *Nature* 462, 90 – 93. (doi:10.1038/nature08504)
- 477 [35] Rainey P. B., Beaumont H. J., Ferguson G. C., Gallie J., Kost C., Libby E.,  
478 Zhang X. X. 2011 The evolutionary emergence of stochastic phenotype switching  
479 in bacteria. *Microb Cell Fact.* 10 Suppl 1:S14. (doi: 10.1186/1475-2859-10-S1-S14)
- 480 [36] Gallie J., Libby E., Bertels F., Remigi P., Jendresen C. B., Ferguson G. C., Desprat  
481 N., Buffing M. F., Sauer U., Beaumont H. J., Martinussen J., Kilstrup M., Rainey  
482 P. B. 2015 Bistability in a metabolic network underpins the de novo evolution  
483 of colony switching in *Pseudomonas fluorescens*. *PLoS Biol.* 13(3):e1002109. (doi:  
484 10.1371/journal.pbio.1002109)
- 485 [37] Wildschutte H., Wolfe D.M., Tamewitz A., Lawrence J.G. 2004 Protozoan preda-  
486 tion, diversifying selection, and the evolution of antigenic diversity in *Salmonella*.  
487 *PNAS* 101(29):10644–10649. (doi:10.1073/pnas.0404028101)
- 488 [38] Andrewes F. W. 1922 Studies in group-agglutination. I. The *Salmonella* group  
489 and its antigenic structure. *J. Path. Bacteriol.* 25, 505 – 521. (doi:10.1002/path.  
490 1700250411)
- 491 [39] Maamar H., Raj A., Dubnau D. 2007 Noise in gene expression determines cell fate  
492 in *Bacillus subtilis*. *Science* 317, 526–529. (doi:10.1126/science.1140818)
- 493 [40] Acar M., Mettetal J. T., van Oudenaarden A. 2008 Stochastic switching as a sur-  
494 vival strategy in fluctuating environments. *Nat. Genet.* 40, 471 – 475. (doi:10.1038/  
495 ng.110)
- 496 [41] Salathe M., Van Cleve J., Feldman M. W. 2009 Evolution of stochastic switching  
497 rates in asymmetric fitness landscapes. *Genetics* 182, 1159 – 1164. (doi:10.1534/  
498 genetics.109.103333)

- 499 [42] Moran N. A. 1992 The Evolutionary Maintenance of Alternative Phenotypes. *Am.*  
500 *Nat.* 139(5): 971–989.
- 501 [43] Libby E. & Rainey P. B. (2013) Eco-Evolutionary Feedback and the Tuning of  
502 Proto-Developmental Life Cycles. *PLoS ONE* 8(12): e82274.
- 503 [44] Leigh Jr. E. G. 1970. Natural selection and mutability. *Am. Nat.* 104: 301–305.
- 504 [45] Zaleski P., Wojciechowski M., Piekarowicz A. 2005 The role of Dam methylation  
505 in phase variation of *Haemophilus influenzae* genes involved in defense against  
506 phage infection. *Microbiology* 151:3361–3369.
- 507 [46] Labrie S. J., Samson J. E., Moineau S. 2010 Bacteriophage resistance mechanisms.  
508 *Nat. Rev. Microbiol.* 8: 317–327.
- 509 [47] Simons A. M. 2002 The continuity of microevolution and macroevolution. *Journal*  
510 *of Evolutionary Biology* 15(5): 688–701.
